# Supplementary material for: Knowledge, Attitude and Practice on the Severity Classification of Adverse Drug Reactions From Reporting to Review: A Multicenter Cross-Sectional Study in China
Source: Research Square preprint supplement (doi:10.21203/rs.3.rs-7605279/v1), 2025-10-23
Supplement: Supplementary file 1 [file 38e3b0b27475fbed673bb463.docx]

**Survey Questionnaire on Knowledge, Attitude, and Practice Regarding the Severity of Adverse Drug Reactions (ADR)**

**Informed Consent**Dear medical professionals and ADR monitoring personnel,
Thank you for taking the time to participate in this survey. The purpose of this survey is to understand the current status and needs of medical personnel and ADR monitoring reviewers in assessing the severity of ADRs when reporting and reviewing them, and to provide references for optimizing the quality of ADR reporting. Given your outstanding contributions in ADR monitoring work, you are specially invited to participate in this survey. Your participation will play an important role in improving the quality of ADR reports.
This survey will take up to 3 minutes of your time. Your responses will be anonymous and confidential, and the relevant data will only be used for statistical analysis and research. By completing the questionnaire, you indicate that you have understood the purpose of this survey and agree to participate. Thank you again for your cooperation.

**I. Basic Information of Respondents**

1. Gender
   A. Male
   B. Female
2. Age Group
   A. ≤35 years old
   B. 36-45 years old
   C. >45 years old
3. Education Level
   A. Bachelor's degree or below
   B. Master's degree
   C. Doctorate or above
4. Professional Title
   A. Junior
   B. Intermediate
   C. Senior
5. Years of Work Experience
   A. ≤5 years
   B. 6-20 years
   C. >20 years
6. Affiliated Institution
   A. Medical Institution
   - Tertiary
   - Secondary
   - Primary

B. ADR Monitoring Center

- - Provincial level
  - Municipal level
  - District/County level

1. Occupation Type
   A. Physician in Medical Institution
   B. Pharmacist in Medical Institution
   C. Nurse in Medical Institution
   D. Reviewer in Monitoring Center
   E. Others
2. Specialty or Department (Please fill in) __________

**II. Knowledge on ADR Severity Classification**

1. Do you know that ADR reporting in China is divided into general and serious cases?
   A. Yes
   B. No
2. Which of the following situations do you consider as serious ADRs?
   A. Leading to death
   B. Life-threatening
   C. Carcinogenic, teratogenic, or causing birth defects
   D. Resulting in significant or permanent disability or organ function damage
   E. Leading to hospitalization or prolongation of hospital stay
   F. Leading to other important medical events where the aforementioned situations may occur without treatment

**III. Attitude Towards ADR Severity Classification**

1. Do you think it is important to improve the awareness of medical personnel and ADR monitoring personnel regarding the severity classification of ADRs?
   A. Very important
   B. Relatively important
   C. Neutral
   D. Not very important
   E. Not important at all
2. Do you think the severity classification of ADRs is important for clinical decision-making?
   A. Very important
   B. Relatively important
   C. Moderately important
   D. Not very important
   E. Not important at all
3. Do you think it is necessary to further classify the severity of ADRs based on the current "general/serious" classification?
   A. Very necessary
   B. Relatively necessary
   C. Moderately necessary
   D. Not very necessary
   E. Not necessary at all

**IV. Behavior Regarding ADR Severity Classification**

1. Is it easy to assess the severity of ADRs based on the current definition of serious ADRs during the reporting/reviewing process?
   A. Very easy
   B. Relatively easy
   C. Neutral
   D. Not easy to execute
   E. Very difficult to execute
2. What are the top three criteria you consider when assessing the severity of ADRs? [Ranking question, select up to 3 options]
   A. Personal experience in ADR reporting/reviewing
   B. Clinical experience
   C. Patient's subjective feelings
   D. Discussion with colleagues
   G. Reference to guidelines, literature, or other materials
3. Do you participate in the review of ADR reports?
   A. Yes
   B. No
4. When reviewing ADR reports, have you encountered situations where your judgment on the severity of ADRs differs from the initial reporting result?
   A. Yes
   B. No
   (This question is only displayed when "3. Do you participate in the review of ADR reports?" is selected as A. Yes)
5. What measures do you think are effective to improve the accuracy of medical personnel in assessing the severity of ADRs when reporting? (Multiple choices allowed)
   A. Providing clear severity classification standards for ADRs
   B. Increasing information on severity description in ADR reporting content
   C. Strengthening training
   D. Others (Please specify) __________

**V. CTCAE Standard**

1. Have you heard of the CTCAE standard for classifying the severity of ADRs?
   A. Yes
   B. No
2. Have you used the CTCAE standard in your daily work or clinical research?
   A. Yes
   B. No
