# Supplementary material for: Knowledge, Attitude and Practice on the Severity Classification of Adverse Drug Reactions From Reporting to Review: A Multicenter Cross-Sectional Study in China
Source: Research Square preprint supplement (doi:10.21203/rs.3.rs-7605279/v1), 2025-10-23
Supplement: Supplementary file 2 [file 80f358095c0af7cc35cc8c0f.docx]

**Supplementary Material 1——specific procedures and detailed results of the pre-test**

Twenty participants were selected for the pre-test, including 15 medical professionals (12 physicians [3 traditional Chinese medicine physicians included], 2 pharmacists, and 1 nurse) and 5 ADR regulatory staffs. Participants with senior professional titles rated the relevance/representativeness of each questionnaire item to its corresponding content dimension. Each item was evaluated on a 4-point Likert scale: 1 = Not relevant, 2 = Weakly relevant, 3 = Strongly relevant, and 4 = Very relevant. Based on the scores, item-level Content Validity Index (I-CVI) and scale-level Content Validity Index (S-CVI) were calculated separately. Following Polit et al.'s method for adjusting random agreement, the adjusted Kappa coefficient (K) and the average scale-level CVI (S-CVI_Ave) were computed to evaluate content validity at both item and scale levels. The evaluation criteria were: K = 0.40–0.59 (fair), K* = 0.60–0.74 (good), and K* > 0.74 (excellent); S-CVI_Ave = 0.7–0.9 (good) and S-CVI_Ave > 0.9 (excellent). The calculation formulas are provided in Equations (1)-(4):

Note:

**I-CVI:** Item-level Content Validity Index

**A:** Number of experts rating an item as relevant (scores 3 or 4)

**n:** Total number of expert raters

**Pc:** Probability of random agreement (binomial distribution with p=0.5)

**S-CVIAve:** Average of all item-level CVIs across the scale

**i:** Total number of items in the questionnaire

After revising items with poor content validity, the final questionnaire achieved a content validity index of 0.82, as shown in Table S1.

| **Table S1** Questionnaire Item Scores and Content Validity Assessment | | | | | | | | | |
| --- | --- | --- | --- | --- | --- | --- | --- | --- | --- |
|  | Knowledge | | Attitudes | | | Practice | | | |
| Expert ID/Item Number | 1 | 2 | 1 | 2 | 3 | 1 | 2 | 4 | 5 |
| 1 | 2 | 4 | 4 | 4 | 4 | 3 | 3 | 2 | 3 |
| 2 | 4 | 4 | 4 | 2 | 2 | 1 | 2 | 2 | 2 |
| 3 | 4 | 3 | 4 | 4 | 4 | 4 | 3 | 3 | 3 |
| 4 | 4 | 4 | 4 | 3 | 3 | 3 | 3 | 3 | 4 |
| 5 | 3 | 3 | 3 | 3 | 4 | 4 | 4 | 4 | 4 |
| I-CVI | 0.8 | 1 | 1 | 0.8 | 0.8 | 0.8 | 0.8 | 0.6 | 0.8 |
| n | 5 | 5 | 5 | 5 | 5 | 5 | 5 | 5 | 5 |
| Pc | 0.16 | 0.03 | 0.03 | 0.16 | 0.16 | 0.16 | 0.16 | 0.31 | 0.01 |
| K* | 0.76 | 1.00 | 1.00 | 0.76 | 0.76 | 0.76 | 0.76 | 0.42 | 0.80 |
| S-CVI/ave | 0.82 | | | | | | | | |
| *Item 3 in the Behavior section serves as a skip logic question designed to differentiate participants involved in ADR report review activities from those who are not. This item is excluded from content validity assessment. Additionally, demographic information and the CTCAE-related section of the questionnaire are collected solely as statistical variables and are not included in the content validity evaluation.* | | | | | | | | | |
